# Supplementary material
Source: PubMed Central journal article supplement (PMC8532201)
Supplement: blood_BLD2021011871_s2.pdf [file blood_BLD2021011871_s2.pdf]

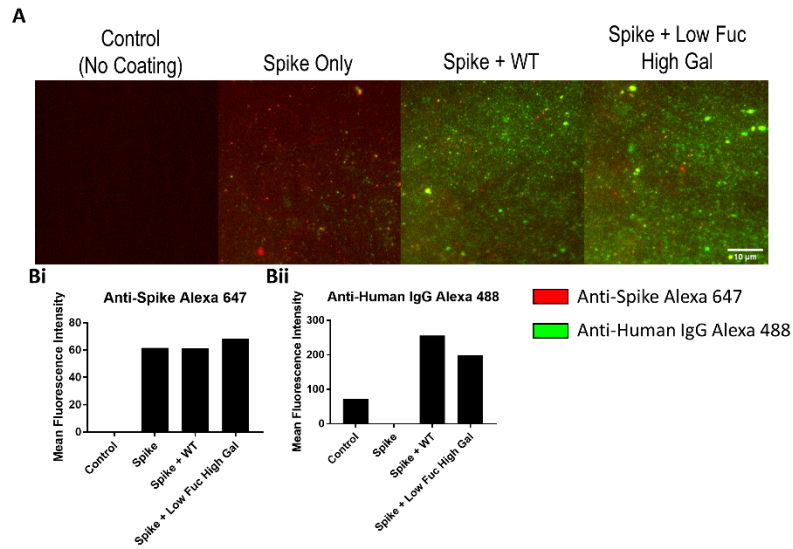

**Supplementary Figure 1. Spike and IgG coating of perfusion chambers.** Perfusion chambers were coating with 5 $\mu$ g/ml spike only, or spike plus either 10 $\mu$ g/ml WT or low fuc, high gal IgG or no coating (control). The presence of spike and human IgG were probed with anti-spike antibody conjugated to alexa-647 and anti-human IgG antibody conjugated to alexa 488 respectively. (A) TIRF microscopy images of spike and IgG adhered to the surface of perfusion chambers. Quantitation of fluorescence intensity of (Bi) anti-spike antibodies and (Bii) anti-human IgG antibodies.
